# Supplementary material for: Circulating Tumor DNA Sequencing Analysis of Gastroesophageal Adenocarcinoma
Source: Oxford University Press journal article supplement (doi:10.1158/1078-0432.ccr-19-1704), 2019-08-19
Supplement: 10780432ccr191704-sup-222885_2_supp_5702749_pvz7mj.xlsx [file 10780432ccr191704-sup-222885_2_supp_5702749_pvz7mj.xlsx]

## Sheet: S1 - Cohort Descriptions
Cohort	Patients	Description
Global	1630	Pts in the global G360 cohort
Global-Detected	977	Pts in the global G360 cohort with maxVAF > 0.5%
Clinically-Annotated	369	UC+SMC pts within the global G360 cohort
Stage IV	305	Stage IV UC or SMC pts who underwent G360
HER2+	57	Stage IV UC or SMC pts who were clinically HER2+ by IHC, Tissue-NGS, and/or FISH*
Serial HER2+	14	Stage IV UC or SMC pts who were clinically HER2+ by IHC, Tissue-NGS and/or FISH* AND underwent G360 within 42 days of progression on HER2-targeting therapy.
Baseline	144	Stage IV UC or SMC pts with advanced metastatic disease having their first blood draw for ctDNA-NGS obtained prior to stage IV therapy.
Baseline HER2+	23	HER2+-targeted pts in the Baseline cohort
IO-Treated	31	Stage IV IO treated-UC patients with G360 within 60 days of IO initiation
UC	273	UC pts in the global G360 cohort
Locally Advanced	53	Resected UC pts with G360 at least once before recurrence
Pre-Neoadjuvant	29	UC pts that underwent resection and had G360 performed prior to receipt of neoadjuvant therapy (28/29) or never received neoadjuvant therapy (1/29).*
Post-Surgery, Pre-Adjuvant	21	UC pts who underwent G360 before adjuvant therapy or within 180 after surgery for patients who did not receive adjuvant therapy.
Serial ct-DNA NGS	36	UC pts who underwent G360 at baseline prior to therapy, and again while on first line treatment
Triplet-Pairs	34	UC pts who underwent G360 at baseline prior to therapy, along with tissue-NGS from paired baseline primary and metastatic biopsies
SMC	96	SMC pts in the global G360 cohort
*Excluding 1 pt who underwent G360 when locally advanced and received peri-operative trastuzumab.
UC - University of Chicago
SMC - Samsung Medical Center

## Sheet: S2 - Untreated Stage IV
PtID	TestID	patientgender	patientage	table_her2	table_race	table_stage	table_stage_current	table_path_stage	table_diff	recurrence	table_location	table_histology	table_2location	total_num_alts	tmb_score	numberoftests	max_pct	num_alts	numberofG360s	alterations	snv_p_n	cnv_p_n	indel_p_n	fusion_p_n	serialtestnumber	numberoftestcat	adj_copynumber	collectionfromdx	DIED	SinceDx	Sincedxorrecur	collectionfromdxorrecur	KRAS_all	KRAS_mt	KRAS_amp	BRAF_all	BRAF_mt	BRAF_amp	MET_all	MET_mt	MET_amp	EGFR_all	EGFR_mt	EGFR_amp	PIK3CA_all	PIK3CA_mt	PIK3CA_amp	ERBB2_all	ERBB2_mt
0007	0007_1	Male	67	-	ASIAN	IV	IV		UNKNOWN	FALSE	GASTRIC	ADENOCARCINOMA	DISTAL	1	1.08467	1	0.29	1	1	Yes	1	0	0	0	1	1		0	1	172	172	0	FALSE	FALSE	FALSE	FALSE	FALSE	FALSE	FALSE	FALSE	FALSE	FALSE	FALSE	FALSE	FALSE	FALSE	FALSE	FALSE	FALSE
0008	0008_1	Female	51	-	ASIAN	IV	IV		POOR	FALSE	GASTRIC	ADENOCARCINOMA	DISTAL	5	5	1	3.97	5	1	Yes	1	0	0	0	1	1		0	1	81	81	0	FALSE	FALSE	FALSE	FALSE	FALSE	FALSE	TRUE	TRUE	FALSE	FALSE	FALSE	FALSE	TRUE	TRUE	FALSE	FALSE	FALSE
0017	0017_1	Male	63	-	ASIAN	IV	IV		POOR	FALSE	GASTRIC	ADENOCARCINOMA	DISTAL	6	6	1	1.79	4	1	Yes	1	0	0	0	1	1		0	1	232	232	0	FALSE	FALSE	FALSE	FALSE	FALSE	FALSE	TRUE	TRUE	FALSE	FALSE	FALSE	FALSE	TRUE	TRUE	FALSE	FALSE	FALSE
0021	0021_1	Male	67	-	CAUCASIAN	IV	IV	UNKNOWN	MODERATE	TRUE	GEJ	ADENOCARCINOMA	PROXIMAL	2	2	1	30.45	2	1	Yes	1	0	0	0	1	1		25	1	62	62	25	FALSE	FALSE	FALSE	FALSE	FALSE	FALSE	FALSE	FALSE	FALSE	FALSE	FALSE	FALSE	TRUE	TRUE	FALSE	FALSE	FALSE
0023	0023_1	Male	73	-	CAUCASIAN	IV	IV	UNKNOWN	POOR	FALSE	ESOPHAGEAL	ADENOCARCINOMA	PROXIMAL	3	2	8	1.13	3	8	Yes	1	1	0	0	1	2+		21	1	717	717	21	FALSE	FALSE	FALSE	FALSE	FALSE	FALSE	FALSE	FALSE	FALSE	TRUE	FALSE	TRUE	FALSE	FALSE	FALSE	FALSE	FALSE
0032	0032_1	Male	58	Equivocal	ASIAN	IV	IV		UNKNOWN	FALSE	GASTRIC	ADENOCARCINOMA	DISTAL	4	4	1	1.4	4	1	Yes	1	0	0	0	1	1		0	1	86	86	0	FALSE	FALSE	FALSE	FALSE	FALSE	FALSE	FALSE	FALSE	FALSE	FALSE	FALSE	FALSE	FALSE	FALSE	FALSE	TRUE	TRUE
0036	0036_1	Male	58	-	ASIAN	IV	IV		UNKNOWN	FALSE	GASTRIC	ADENOCARCINOMA	DISTAL	2	2.64201	1	0.18	2	1	Yes	1	0	0	0	1	1		0	1	819	819	0	FALSE	FALSE	FALSE	FALSE	FALSE	FALSE	FALSE	FALSE	FALSE	FALSE	FALSE	FALSE	FALSE	FALSE	FALSE	FALSE	FALSE
0041	0041_1	Female	59	-	ASIAN	IV	IV		POOR	FALSE	GASTRIC	ADENOCARCINOMA	DISTAL	1	1.08467	1		0	1	Yes	1	0	0	0	1	1		0	1	100	100	0	FALSE	FALSE	FALSE	FALSE	FALSE	FALSE	FALSE	FALSE	FALSE	FALSE	FALSE	FALSE	FALSE	FALSE	FALSE	FALSE	FALSE
0090	0090_1	Male	60	+	ASIAN	IV	IV		UNKNOWN	TRUE	GASTRIC	ADENOCARCINOMA	DISTAL	2	2	1	0.71	2	1	Yes	1	0	0	0	1	1		0	0	1226	1226	0	FALSE	FALSE	FALSE	FALSE	FALSE	FALSE	FALSE	FALSE	FALSE	FALSE	FALSE	FALSE	FALSE	FALSE	FALSE	FALSE	FALSE
0100	0100_1	Female	54	-	ASIAN	IV	IV		UNKNOWN	FALSE	GASTRIC	ADENOCARCINOMA	DISTAL	2	2	1	1.67	2	1	Yes	1	0	0	0	1	1		21	1	306	306	21	FALSE	FALSE	FALSE	FALSE	FALSE	FALSE	FALSE	FALSE	FALSE	FALSE	FALSE	FALSE	FALSE	FALSE	FALSE	FALSE	FALSE
0104	0104_1	Male	55	-	ASIAN	IV	IV		POOR	FALSE	GASTRIC	ADENOCARCINOMA	DISTAL	12	10	1	7.32	10	1	Yes	1	1	0	0	1	1		55	0	1268	1268	55	TRUE	TRUE	FALSE	FALSE	FALSE	FALSE	FALSE	FALSE	FALSE	FALSE	FALSE	FALSE	FALSE	FALSE	FALSE	FALSE	FALSE
0128	0128_1	Male	52	-	ASIAN	IV	IV		UNKNOWN	TRUE	GASTRIC	ADENOCARCINOMA	DISTAL	7	7	1	7.03	5	1	Yes	1	0	0	0	1	1		8	1	19	19	8	FALSE	FALSE	FALSE	FALSE	FALSE	FALSE	FALSE	FALSE	FALSE	FALSE	FALSE	FALSE	FALSE	FALSE	FALSE	FALSE	FALSE
0170	0170_1	Male	63	-	ASIAN	IV	IV		UNKNOWN	TRUE	GASTRIC	ADENOCARCINOMA	DISTAL	1	1.08467	1		0	1	Yes	1	0	0	0	1	1		0	1	453	453	0	FALSE	FALSE	FALSE	FALSE	FALSE	FALSE	FALSE	FALSE	FALSE	FALSE	FALSE	FALSE	FALSE	FALSE	FALSE	FALSE	FALSE
0176	0176_1	Male	75	Equivocal	ASIAN	IV	IV		MODERATE	TRUE	GASTRIC	ADENOCARCINOMA	DISTAL	5	4	1	14.78	4	1	Yes	1	1	0	0	1	1		0	1	216	216	0	FALSE	FALSE	FALSE	FALSE	FALSE	FALSE	FALSE	FALSE	FALSE	FALSE	FALSE	FALSE	FALSE	FALSE	FALSE	FALSE	FALSE
0195	0195_1	Male	58	-	ASIAN	IV	IV		POOR	TRUE	GASTRIC	ADENOCARCINOMA	DISTAL	1	1.08467	1	0.17	1	1	Yes	1	0	0	0	1	1		0	0	1097	1097	0	FALSE	FALSE	FALSE	FALSE	FALSE	FALSE	FALSE	FALSE	FALSE	FALSE	FALSE	FALSE	FALSE	FALSE	FALSE	FALSE	FALSE
0206	0206_1	Female	52	UNKNOWN	ASIAN	IV	IV		UNKNOWN	FALSE	GASTRIC	ADENOCARCINOMA	DISTAL	45	39	1	8.23	39	1	Yes	1	0	0	0	1	1		58	0	58	58	58	TRUE	TRUE	FALSE	TRUE	TRUE	FALSE	FALSE	FALSE	FALSE	TRUE	TRUE	FALSE	TRUE	TRUE	FALSE	TRUE	TRUE
0222	0222_1	Male	82	-	ASIAN	IV	IV		MODERATE	TRUE	GASTRIC	ADENOCARCINOMA	DISTAL	6	4.28495	1	0.68	6	1	Yes	1	1	0	0	1	1		0	1	133	133	0	TRUE	FALSE	TRUE	FALSE	FALSE	FALSE	FALSE	FALSE	FALSE	TRUE	TRUE	FALSE	FALSE	FALSE	FALSE	FALSE	FALSE
0231	0231_1	Male	61	-	ASIAN	IV	IV		POOR	FALSE	GASTRIC	ADENOCARCINOMA	DISTAL	2	1	1	8.35	2	1	Yes	1	0	0	0	1	1		22	1	69	69	22	TRUE	TRUE	FALSE	FALSE	FALSE	FALSE	FALSE	FALSE	FALSE	FALSE	FALSE	FALSE	FALSE	FALSE	FALSE	FALSE	FALSE
0235	0235_1	Female	39	UNKNOWN	ASIAN	IV	IV		UNKNOWN	FALSE	GASTRIC	ADENOCARCINOMA	DISTAL	3	3	1	2.84	3	1	Yes	1	0	0	0	1	1		21	0	1069	1069	21	FALSE	FALSE	FALSE	FALSE	FALSE	FALSE	FALSE	FALSE	FALSE	FALSE	FALSE	FALSE	FALSE	FALSE	FALSE	FALSE	FALSE
0260	0260_1	Male	33	-	ASIAN	IV	IV		UNKNOWN	TRUE	GASTRIC	ADENOCARCINOMA	DISTAL	7	4	1	10.52	6	1	Yes	1	1	0	0	1	1		10	1	185	185	10	FALSE	FALSE	FALSE	FALSE	FALSE	FALSE	TRUE	FALSE	TRUE	FALSE	FALSE	FALSE	FALSE	FALSE	FALSE	FALSE	FALSE
0261	0261_1	Male	76	-	ASIAN	IV	IV		MODERATE	FALSE	GASTRIC	ADENOCARCINOMA	DISTAL	7	5	1	16.78	5	1	Yes	1	1	0	0	1	1	0.143898	9	1	432	432	9	FALSE	FALSE	FALSE	FALSE	FALSE	FALSE	FALSE	FALSE	FALSE	TRUE	FALSE	TRUE	FALSE	FALSE	FALSE	FALSE	FALSE
0277	0277_1	Male	58	-	ASIAN	IV	IV		MODERATE	FALSE	GASTRIC	ADENOCARCINOMA	DISTAL	12	9	1	5.53	8	1	Yes	1	1	0	0	1	1		0	1	398	398	0	FALSE	FALSE	FALSE	TRUE	TRUE	FALSE	TRUE	TRUE	FALSE	FALSE	FALSE	FALSE	FALSE	FALSE	FALSE	FALSE	FALSE
0292	0292_1	Male	68	-	CAUCASIAN	II	IV	UNKNOWN	POOR	TRUE	ESOPHAGEAL	ADENOCARCINOMA	PROXIMAL	6	5	1	2.76	4	1	Yes	1	0	0	0	1	1		588	1	1163	609	34	TRUE	TRUE	FALSE	FALSE	FALSE	FALSE	FALSE	FALSE	FALSE	FALSE	FALSE	FALSE	FALSE	FALSE	FALSE	FALSE	FALSE
0323	0323_1	Male	56	-	CAUCASIAN	III	IV	UNKNOWN	POOR	TRUE	ESOPHAGEAL	ADENOCARCINOMA	PROXIMAL	4	3	1	16.18	4	1	Yes	1	0	0	1	1	1		387	1	464	149	72	FALSE	FALSE	FALSE	FALSE	FALSE	FALSE	FALSE	FALSE	FALSE	FALSE	FALSE	FALSE	FALSE	FALSE	FALSE	FALSE	FALSE
0328	0328_1	Female	68	-	ASIAN	IV	IV	UNKNOWN	POOR	FALSE	GASTRIC	ADENOCARCINOMA	DISTAL	4	3	2	1.14	3	2	Yes	1	0	0	0	1	2+		35	1	425	425	35	FALSE	FALSE	FALSE	FALSE	FALSE	FALSE	FALSE	FALSE	FALSE	TRUE	TRUE	FALSE	FALSE	FALSE	FALSE	FALSE	FALSE
0357	0357_1	Male	65	-	CAUCASIAN	III	IV	UNKNOWN	MODERATE	TRUE	ESOPHAGEAL	ADENOCARCINOMA	PROXIMAL	5	5.16256	4	0.9	5	4	Yes	1	0	0	0	1	2+		486	1	736	259	9	FALSE	FALSE	FALSE	FALSE	FALSE	FALSE	FALSE	FALSE	FALSE	FALSE	FALSE	FALSE	FALSE	FALSE	FALSE	FALSE	FALSE
0377	0377_1	Male	42	-	CAUCASIAN	IV	IV	UNKNOWN	POOR	FALSE	ESOPHAGEAL	ADENOCARCINOMA	PROXIMAL	3	3.29524	4	0.53	3	4	Yes	1	0	0	0	1	2+		22	1	361	361	22	FALSE	FALSE	FALSE	FALSE	FALSE	FALSE	FALSE	FALSE	FALSE	FALSE	FALSE	FALSE	FALSE	FALSE	FALSE	FALSE	FALSE
0393	0393_1	Male	56	-	CAUCASIAN	IV	IV	UNKNOWN	POOR	FALSE	GASTRIC	ADENOCARCINOMA	DISTAL	38	35	3	10.69	29	3	Yes	1	0	0	0	1	2+		13	1	265	265	13	TRUE	TRUE	FALSE	FALSE	FALSE	FALSE	FALSE	FALSE	FALSE	TRUE	TRUE	FALSE	FALSE	FALSE	FALSE	FALSE	FALSE
0408	0408_1	Male	81	-	CAUCASIAN	III	IV	III	WELL	TRUE	GASTRIC	ADENOCARCINOMA	DISTAL	2	2	5	11.53	2	6	Yes	1	0	0	0	1	2+		1171	0	2004	857	24	FALSE	FALSE	FALSE	FALSE	FALSE	FALSE	TRUE	TRUE	FALSE	FALSE	FALSE	FALSE	FALSE	FALSE	FALSE	FALSE	FALSE
0425	0425_1	Male	66	-	CAUCASIAN	III	IV	III	POOR	TRUE	GEJ	ADENOCARCINOMA	PROXIMAL	2	2.64201	1	0.21	2	1	Yes	1	0	0	0	1	1		430	1	500	104	34	FALSE	FALSE	FALSE	FALSE	FALSE	FALSE	FALSE	FALSE	FALSE	FALSE	FALSE	FALSE	FALSE	FALSE	FALSE	FALSE	FALSE
0434	0434_1	Male	64	-	HISPANIC	IV	IV	UNKNOWN	MODERATE	FALSE	GASTRIC	ADENOCARCINOMA	DISTAL	6	4.26346	3	0.69	6	3	Yes	1	1	0	0	1	2+		49	1	307	307	49	FALSE	FALSE	FALSE	FALSE	FALSE	FALSE	FALSE	FALSE	FALSE	FALSE	FALSE	FALSE	FALSE	FALSE	FALSE	FALSE	FALSE
0462	0462_1	Female	82	UNKNOWN	AFRICAN AMERICAN	I	IV	I	POOR	TRUE	GASTRIC	ADENOCARCINOMA	DISTAL	6	6	1	2.61	6	1	Yes	1	0	0	0	1	1		899	0	1006	118	11	FALSE	FALSE	FALSE	FALSE	FALSE	FALSE	FALSE	FALSE	FALSE	FALSE	FALSE	FALSE	FALSE	FALSE	FALSE	FALSE	FALSE
0521	0521_1	Female	74	-	CAUCASIAN	IV	IV	UNKNOWN	MODERATE	FALSE	GEJ	ADENOCARCINOMA	PROXIMAL	8	4	4	1.42	6	6	Yes	1	1	0	0	1	2+	1.6874	7	1	431	431	7	TRUE	TRUE	FALSE	FALSE	FALSE	FALSE	TRUE	FALSE	TRUE	TRUE	TRUE	TRUE	FALSE	FALSE	FALSE	TRUE	TRUE
0523	0523_1	Male	54	-	CAUCASIAN	IV	IV	UNKNOWN	MODERATE	FALSE	ESOPHAGEAL	ADENOCARCINOMA	PROXIMAL	1	1.08467	5		0	9	Yes	1	0	0	0	1	2+		2	1	634	634	2	FALSE	FALSE	FALSE	FALSE	FALSE	FALSE	FALSE	FALSE	FALSE	FALSE	FALSE	FALSE	FALSE	FALSE	FALSE	FALSE	FALSE
0553	0553_1	Male	50	-	CAUCASIAN	IV	IV	UNKNOWN	POOR	FALSE	GASTRIC	ADENOCARCINOMA	DISTAL	6	3	2	10.2	6	2	Yes	1	1	0	0	1	2+		23	1	167	167	23	FALSE	FALSE	FALSE	TRUE	FALSE	TRUE	TRUE	FALSE	TRUE	FALSE	FALSE	FALSE	FALSE	FALSE	FALSE	FALSE	FALSE
0557	0557_1	Male	74	-	CAUCASIAN	II	IV	II	POOR	TRUE	GASTRIC	ADENOCARCINOMA	DISTAL	6	3	4	19.77	5	4	Yes	1	0	0	0	1	2+		71	1	345	345	71	TRUE	TRUE	FALSE	TRUE	TRUE	FALSE	FALSE	FALSE	FALSE	FALSE	FALSE	FALSE	FALSE	FALSE	FALSE	FALSE	FALSE
0577	0577_1	Male	69	-	CAUCASIAN	IV	IV	UNKNOWN	POOR	FALSE	ESOPHAGEAL	ADENOCARCINOMA	PROXIMAL	9	2	3	28.0414	9	3	Yes	1	1	0	0	1	2+	0.0455298	21	1	267	267	21	FALSE	FALSE	FALSE	FALSE	FALSE	FALSE	TRUE	FALSE	TRUE	TRUE	TRUE	TRUE	FALSE	FALSE	FALSE	FALSE	FALSE
0580	0580_1	Male	77	-	CAUCASIAN	IV	IV	UNKNOWN	POOR	FALSE	ESOPHAGEAL	ADENOCARCINOMA	PROXIMAL	7	4	6	17.82	7	6	Yes	1	1	0	0	1	2+		43	1	475	475	43	FALSE	FALSE	FALSE	FALSE	FALSE	FALSE	FALSE	FALSE	FALSE	FALSE	FALSE	FALSE	TRUE	FALSE	TRUE	FALSE	FALSE
0609	0609_1	Male	67	-	CAUCASIAN	IV	IV	UNKNOWN	POOR	TRUE	ESOPHAGEAL	ADENOCARCINOMA	PROXIMAL	4	3	4	1.10614	4	4	Yes	1	1	0	0	1	2+	2.06927	746	1	1106	500	140	FALSE	FALSE	FALSE	FALSE	FALSE	FALSE	FALSE	FALSE	FALSE	FALSE	FALSE	FALSE	FALSE	FALSE	FALSE	FALSE	FALSE
0619	0619_1	Female	38	-	CAUCASIAN	IV	IV	UNKNOWN	POOR	FALSE	GEJ	ADENOCARCINOMA	PROXIMAL	2	1.08467	1	0.286257	2	1	Yes	1	1	0	0	1	1	7.84931	15	0	629	629	15	FALSE	FALSE	FALSE	FALSE	FALSE	FALSE	FALSE	FALSE	FALSE	FALSE	FALSE	FALSE	FALSE	FALSE	FALSE	FALSE	FALSE
0621	0621_1	Male	53	-	AFRICAN AMERICAN	III	IV	UNKNOWN	MODERATE	TRUE	GEJ	ADENOCARCINOMA	PROXIMAL	3	3.31294	2	0.52293	2	3	Yes	1	0	1	0	1	2+		715	1	1108	408	15	FALSE	FALSE	FALSE	FALSE	FALSE	FALSE	FALSE	FALSE	FALSE	FALSE	FALSE	FALSE	FALSE	FALSE	FALSE	FALSE	FALSE
0622	0622_1	Male	78	-	CAUCASIAN	III	IV	III	WELL	TRUE	GEJ	ADENOCARCINOMA	PROXIMAL	5	4.14481	1	0.760078	4	1	Yes	1	0	1	0	1	1		653	1	1101	444	-4	TRUE	TRUE	FALSE	FALSE	FALSE	FALSE	FALSE	FALSE	FALSE	FALSE	FALSE	FALSE	FALSE	FALSE	FALSE	FALSE	FALSE
0627	0627_1	Male	73	-	CAUCASIAN	IV	IV	UNKNOWN	POOR	FALSE	GEJ	ADENOCARCINOMA	PROXIMAL	2	1	2	7.29857	2	2	Yes	1	1	0	0	1	2+	0.311824	19	1	186	186	19	FALSE	FALSE	FALSE	FALSE	FALSE	FALSE	FALSE	FALSE	FALSE	FALSE	FALSE	FALSE	FALSE	FALSE	FALSE	FALSE	FALSE
0633	0633_1	Female	56	-	ASIAN	IV	IV	UNKNOWN	POOR	FALSE	GASTRIC	ADENOCARCINOMA	DISTAL	5	4	3	12.1377	4	3	Yes	1	1	1	0	1	2+		28	1	231	231	28	FALSE	FALSE	FALSE	FALSE	FALSE	FALSE	FALSE	FALSE	FALSE	FALSE	FALSE	FALSE	FALSE	FALSE	FALSE	FALSE	FALSE
0636	0636_1	Male	75	-	CAUCASIAN	IV	IV	UNKNOWN	POOR	FALSE	GEJ	ADENOCARCINOMA	PROXIMAL	2	2	3	1.33655	2	5	Yes	1	0	0	0	1	2+		42	1	398	398	42	FALSE	FALSE	FALSE	FALSE	FALSE	FALSE	FALSE	FALSE	FALSE	FALSE	FALSE	FALSE	FALSE	FALSE	FALSE	FALSE	FALSE
0640	0640_1	Female	53	-	CAUCASIAN	IV	IV	UNKNOWN	POOR	FALSE	GASTRIC	ADENOCARCINOMA	DISTAL	8	5	3	29.9518	8	5	Yes	1	1	1	0	1	2+		14	1	341	341	14	FALSE	FALSE	FALSE	FALSE	FALSE	FALSE	FALSE	FALSE	FALSE	TRUE	FALSE	TRUE	FALSE	FALSE	FALSE	FALSE	FALSE
0663	0663_1	Male	77	-	CAUCASIAN	IV	IV	IV	POOR	FALSE	ESOPHAGEAL	ADENOCARCINOMA	PROXIMAL	8	7	2	62.1868	8	2	Yes	1	1	1	0	1	2+		3	1	410	410	3	FALSE	FALSE	FALSE	FALSE	FALSE	FALSE	FALSE	FALSE	FALSE	FALSE	FALSE	FALSE	TRUE	TRUE	FALSE	FALSE	FALSE
0666	0666_1	Male	60	UNKNOWN	ASIAN	IV	IV		MODERATE	FALSE	GASTRIC	ADENOCARCINOMA	DISTAL	5	2	1	10.5873	5	1	Yes	0	1	1	0	1	1	0.212549	0	0	558	558	0	FALSE	FALSE	FALSE	FALSE	FALSE	FALSE	TRUE	FALSE	TRUE	FALSE	FALSE	FALSE	FALSE	FALSE	FALSE	FALSE	FALSE
0687	0687_1	Male	64	-	CAUCASIAN	III	IV	III	UNKNOWN	TRUE	ESOPHAGEAL	ADENOCARCINOMA	PROXIMAL	3	3	1	1.0865	2	2	Yes	1	0	0	0	1	1		531	1	1050	535	16	FALSE	FALSE	FALSE	FALSE	FALSE	FALSE	FALSE	FALSE	FALSE	FALSE	FALSE	FALSE	FALSE	FALSE	FALSE	FALSE	FALSE
0688	0688_1	Male	63	-	ASIAN	IV	IV		POOR	FALSE	GASTRIC	ADENOCARCINOMA	DISTAL	2	1	1	0.924137	2	1	Yes	1	1	0	0	1	1	4.5983	0	1	517	517	0	FALSE	FALSE	FALSE	FALSE	FALSE	FALSE	FALSE	FALSE	FALSE	FALSE	FALSE	FALSE	FALSE	FALSE	FALSE	FALSE	FALSE
0717	0717_1	Male	55	-	CAUCASIAN	IV	IV	UNKNOWN	MODERATE	FALSE	ESOPHAGEAL	ADENOCARCINOMA	PROXIMAL	5	3	2	76.0305	5	2	Yes	1	1	0	0	1	2+		3	1	100	100	3	FALSE	FALSE	FALSE	FALSE	FALSE	FALSE	FALSE	FALSE	FALSE	FALSE	FALSE	FALSE	FALSE	FALSE	FALSE	FALSE	FALSE
0735	0735_1	Male	73	-	CAUCASIAN	IV	IV	UNKNOWN	UNKNOWN	FALSE	GASTRIC	ADENOCARCINOMA	DISTAL	4	4.31568	1	0.343933	3	1	Yes	1	0	0	0	1	1		17	1	210	210	17	FALSE	FALSE	FALSE	FALSE	FALSE	FALSE	TRUE	TRUE	FALSE	FALSE	FALSE	FALSE	FALSE	FALSE	FALSE	FALSE	FALSE
0738	0738_1	Male	63	-	HISPANIC	IV	IV	UNKNOWN	POOR	FALSE	GASTRIC	ADENOCARCINOMA	DISTAL	7	4	2	1.87349	7	6	Yes	1	1	1	0	1	2+	2.01026	13	0	538	538	13	FALSE	FALSE	FALSE	FALSE	FALSE	FALSE	TRUE	TRUE	FALSE	TRUE	TRUE	TRUE	FALSE	FALSE	FALSE	TRUE	TRUE
0766	0766_1	Male	59	-	CAUCASIAN	IV	IV	UNKNOWN	MODERATE	FALSE	ESOPHAGEAL	ADENOCARCINOMA	PROXIMAL	4	3	2	1.61097	4	6	Yes	1	1	0	0	1	2+		19	1	509	509	19	TRUE	FALSE	TRUE	FALSE	FALSE	FALSE	FALSE	FALSE	FALSE	FALSE	FALSE	FALSE	FALSE	FALSE	FALSE	FALSE	FALSE
0774	0774_1	Female	43	-	AFRICAN AMERICAN	IV	IV	UNKNOWN	POOR	FALSE	GASTRIC	ADENOCARCINOMA	DISTAL	1	0	1	0.128114	1	1	Yes	1	0	0	0	1	1		21	1	82	82	21	TRUE	TRUE	FALSE	FALSE	FALSE	FALSE	FALSE	FALSE	FALSE	FALSE	FALSE	FALSE	FALSE	FALSE	FALSE	FALSE	FALSE
0786	0786_1	Male	66	-	ASIAN	IV	IV		MODERATE	FALSE	GASTRIC	ADENOCARCINOMA	DISTAL	5	3	1	18.7344	5	1	Yes	1	1	1	0	1	1		4	0	478	478	4	FALSE	FALSE	FALSE	FALSE	FALSE	FALSE	FALSE	FALSE	FALSE	TRUE	FALSE	TRUE	FALSE	FALSE	FALSE	FALSE	FALSE
0799	0799_1	Male	59	-	CAUCASIAN	IV	IV	UNKNOWN	POOR	FALSE	ESOPHAGEAL	ADENOCARCINOMA	PROXIMAL	7	3	2	51.3223	7	3	Yes	1	1	0	0	1	2+		29	0	510	510	29	TRUE	TRUE	TRUE	FALSE	FALSE	FALSE	FALSE	FALSE	FALSE	FALSE	FALSE	FALSE	FALSE	FALSE	FALSE	FALSE	FALSE
0807	0807_1	Female	59	-	CAUCASIAN	IV	IV	UNKNOWN	UNKNOWN	FALSE	GASTRIC	ADENOCARCINOMA	DISTAL	6	4	2	7.97959	5	4	Yes	1	1	0	1	1	2+		15	1	462	462	15	FALSE	FALSE	FALSE	FALSE	FALSE	FALSE	FALSE	FALSE	FALSE	TRUE	FALSE	TRUE	FALSE	FALSE	FALSE	FALSE	FALSE
0823	0823_1	Male	68	-	CAUCASIAN	IV	IV	UNKNOWN	POOR	FALSE	ESOPHAGEAL	ADENOCARCINOMA	PROXIMAL	2	2.15318	1	0.144652	1	2	Yes	1	0	1	0	1	1		29	1	212	212	29	FALSE	FALSE	FALSE	FALSE	FALSE	FALSE	FALSE	FALSE	FALSE	FALSE	FALSE	FALSE	FALSE	FALSE	FALSE	FALSE	FALSE
0826	0826_1	Male	57	-	CAUCASIAN	IV	IV	UNKNOWN	MODERATE	FALSE	GASTRIC	ADENOCARCINOMA	DISTAL	5	4	1	2.07969	5	2	Yes	1	1	1	0	1	1		37	1	124	124	37	FALSE	FALSE	FALSE	FALSE	FALSE	FALSE	TRUE	FALSE	TRUE	FALSE	FALSE	FALSE	FALSE	FALSE	FALSE	FALSE	FALSE
0867	0867_1	Female	48	-	CAUCASIAN	IV	IV	UNKNOWN	MODERATE	FALSE	ESOPHAGEAL	ADENOCARCINOMA	PROXIMAL	4	2	1	16.1118	4	1	Yes	1	1	0	0	1	1	0.159137	21	1	242	242	21	FALSE	FALSE	FALSE	FALSE	FALSE	FALSE	FALSE	FALSE	FALSE	FALSE	FALSE	FALSE	FALSE	FALSE	FALSE	FALSE	FALSE
0875	0875_1	Female	56	-	CAUCASIAN	IV	IV	UNKNOWN	UNKNOWN	FALSE	GASTRIC	ADENOCARCINOMA	DISTAL	2	2	1	9.60402	2	2	Yes	1	0	0	0	1	1		12	0	433	433	12	FALSE	FALSE	FALSE	FALSE	FALSE	FALSE	FALSE	FALSE	FALSE	FALSE	FALSE	FALSE	FALSE	FALSE	FALSE	FALSE	FALSE
0575	0575_2	Male	79	-	CAUCASIAN	III	IV	UNKNOWN	POOR	TRUE	ESOPHAGEAL	ADENOCARCINOMA	PROXIMAL	9		2	50.7462	8	2	Yes	1	1	0	0	2	2+	0.0499892	533	0	667	171	37	FALSE	FALSE	FALSE	FALSE	FALSE	FALSE	TRUE	FALSE	TRUE	FALSE	FALSE	FALSE	FALSE	FALSE	FALSE	FALSE	FALSE
0917	0917_1	Male	63	-	CAUCASIAN	IV	IV	UNKNOWN	POOR	FALSE	ESOPHAGEAL	ADENOCARCINOMA	PROXIMAL	1		3	0.172791	1	3	Yes	1	0	0	0	1	2+		30	0	419	419	30	FALSE	FALSE	FALSE	FALSE	FALSE	FALSE	FALSE	FALSE	FALSE	FALSE	FALSE	FALSE	FALSE	FALSE	FALSE	FALSE	FALSE
0943	0943_1	Female	62	-	CAUCASIAN	IV	IV	UNKNOWN	UNKNOWN	FALSE	ESOPHAGEAL	ADENOCARCINOMA	PROXIMAL	2	2	2	0.595423	2	2	Yes	1	0	0	0	1	2+		4	0	44	44	4	FALSE	FALSE	FALSE	TRUE	TRUE	FALSE	TRUE	TRUE	FALSE	FALSE	FALSE	FALSE	FALSE	FALSE	FALSE	FALSE	FALSE
0944	0944_1	Male	69	UNKNOWN	CAUCASIAN	IV	IV	UNKNOWN	POOR	FALSE	GASTRIC	ADENOCARCINOMA	DISTAL	1		1	0	1	1	Yes	0	1	0	0	1	1	301.939	22	0	392	392	22	FALSE	FALSE	FALSE	FALSE	FALSE	FALSE	FALSE	FALSE	FALSE	FALSE	FALSE	FALSE	FALSE	FALSE	FALSE	FALSE	FALSE
0972	0972_1	Female	62	-	CAUCASIAN	IV	IV	UNKNOWN	POOR	TRUE	GASTRIC	ADENOCARCINOMA	DISTAL	1		2	0	1	2	Yes	0	1	0	0	1	2+	220.784	184	0	541	379	22	FALSE	FALSE	FALSE	FALSE	FALSE	FALSE	FALSE	FALSE	FALSE	FALSE	FALSE	FALSE	FALSE	FALSE	FALSE	FALSE	FALSE
1015	1015_1	Male	49	-	CAUCASIAN	IV	IV	UNKNOWN	POOR	FALSE	GEJ	ADENOCARCINOMA	PROXIMAL	7	2	1	0.611892	5	1	Yes	1	1	0	0	1	1	2.96169	6	1	74	74	6	FALSE	FALSE	FALSE	FALSE	FALSE	FALSE	FALSE	FALSE	FALSE	FALSE	FALSE	FALSE	TRUE	FALSE	TRUE	FALSE	FALSE
1024	1024_1	Male	75	-	CAUCASIAN	IV	IV	UNKNOWN	POOR	FALSE	ESOPHAGEAL	ADENOCARCINOMA	PROXIMAL	3	3	4	1.31628	2	4	Yes	1	0	0	0	1	2+		16	1	204	204	16	FALSE	FALSE	FALSE	FALSE	FALSE	FALSE	FALSE	FALSE	FALSE	TRUE	TRUE	FALSE	FALSE	FALSE	FALSE	FALSE	FALSE
1034	1034_1	Male	73	-	CAUCASIAN	IV	IV	UNKNOWN	POOR	FALSE	GASTRIC	ADENOCARCINOMA	DISTAL	3		1	0.298843	2	1	Yes	1	0	0	0	1	1		31	1	326	326	31	FALSE	FALSE	FALSE	FALSE	FALSE	FALSE	FALSE	FALSE	FALSE	FALSE	FALSE	FALSE	FALSE	FALSE	FALSE	FALSE	FALSE
1054	1054_1	Male	65	-	CAUCASIAN	IV	IV	UNKNOWN	MODERATE	FALSE	ESOPHAGEAL	ADENOCARCINOMA	PROXIMAL	4	2	1	26.5431	4	1	Yes	1	1	1	0	1	1		34	1	83	83	34	TRUE	FALSE	TRUE	FALSE	FALSE	FALSE	FALSE	FALSE	FALSE	TRUE	FALSE	TRUE	FALSE	FALSE	FALSE	FALSE	FALSE
1064	1064_1	Male	68	-	CAUCASIAN	IV	IV	UNKNOWN	POOR	FALSE	GASTRIC	ADENOCARCINOMA	DISTAL	3	3	3	0.852364	3	3	Yes	1	0	1	0	1	2+		15	0	309	309	15	FALSE	FALSE	FALSE	FALSE	FALSE	FALSE	FALSE	FALSE	FALSE	FALSE	FALSE	FALSE	FALSE	FALSE	FALSE	FALSE	FALSE
1065	1065_1	Male	71	-	AFRICAN AMERICAN	IV	IV	UNKNOWN	POOR	FALSE	GASTRIC	ADENOCARCINOMA	DISTAL	1	1	1	3.7434	1	1	Yes	1	0	0	0	1	1		13	0	301	301	13	FALSE	FALSE	FALSE	FALSE	FALSE	FALSE	FALSE	FALSE	FALSE	FALSE	FALSE	FALSE	FALSE	FALSE	FALSE	FALSE	FALSE
1105	1105_1	Male	30	-	CAUCASIAN	IV	IV	UNKNOWN	UNKNOWN	FALSE	GEJ	ADENOCARCINOMA	PROXIMAL	6	4	3	2.74624	5	3	Yes	1	1	1	0	1	2+		35	0	294	294	35	FALSE	FALSE	FALSE	FALSE	FALSE	FALSE	FALSE	FALSE	FALSE	TRUE	FALSE	TRUE	FALSE	FALSE	FALSE	FALSE	FALSE
1106	1106_1	Male	45	-	OTHER/UNKNOWN	IV	IV	UNKNOWN	POOR	FALSE	GEJ	ADENOCARCINOMA	PROXIMAL	4	3	1	1.04727	4	1	Yes	1	0	0	1	1	1		31	0	31	31	31	FALSE	FALSE	FALSE	FALSE	FALSE	FALSE	FALSE	FALSE	FALSE	FALSE	FALSE	FALSE	TRUE	TRUE	FALSE	FALSE	FALSE
1115	1115_1	Male	59	-	OTHER/UNKNOWN	IV	IV	UNKNOWN	POOR	FALSE	GEJ	ADENOCARCINOMA	PROXIMAL	10		2	70.7519	9	2	Yes	1	1	0	0	1	2+		14	1	268	268	14	TRUE	FALSE	TRUE	FALSE	FALSE	FALSE	FALSE	FALSE	FALSE	TRUE	FALSE	TRUE	TRUE	FALSE	TRUE	FALSE	FALSE
1128	1128_1	Male	63	-	CAUCASIAN	I	IV	UNKNOWN	MODERATE	TRUE	GEJ	ADENOCARCINOMA	PROXIMAL	3		1	0.137252	3	1	Yes	1	1	0	0	1	1		303	1	331	50	22	FALSE	FALSE	FALSE	TRUE	TRUE	FALSE	FALSE	FALSE	FALSE	FALSE	FALSE	FALSE	FALSE	FALSE	FALSE	FALSE	FALSE
1219	1219_1	Male	80	-	CAUCASIAN	IV	IV	UNKNOWN	POOR	FALSE	GASTRIC	ADENOCARCINOMA	DISTAL	4	4	1	0.768356	4	1	Yes	1	0	1	0	1	1		28	0	28	28	28	FALSE	FALSE	FALSE	FALSE	FALSE	FALSE	FALSE	FALSE	FALSE	FALSE	FALSE	FALSE	FALSE	FALSE	FALSE	TRUE	TRUE
1225	1225_1	Male	58	UNKNOWN	AFRICAN AMERICAN	IV	IV	UNKNOWN	POOR	FALSE	GASTRIC	ADENOCARCINOMA	DISTAL	23	14	1	47.6995	19	1	Yes	1	1	1	0	1	1		46	1	115	115	46	TRUE	TRUE	TRUE	TRUE	FALSE	TRUE	TRUE	FALSE	TRUE	TRUE	FALSE	TRUE	TRUE	TRUE	FALSE	TRUE	TRUE
1235	1235_1	Male	65	-	CAUCASIAN	IV	IV	UNKNOWN	POOR	FALSE	GASTRIC	ADENOCARCINOMA	DISTAL	6	1	2	43.578	6	2	Yes	1	1	1	0	1	2+		-1	0	181	181	-1	FALSE	FALSE	FALSE	FALSE	FALSE	FALSE	TRUE	FALSE	TRUE	TRUE	FALSE	TRUE	FALSE	FALSE	FALSE	FALSE	FALSE
1248	1248_1	Female	61	UNKNOWN	CAUCASIAN	II	IV	UNKNOWN	UNKNOWN	TRUE	ESOPHAGEAL	ADENOCARCINOMA	PROXIMAL	1		1		0	1	Yes	1	0	0	0	1	1		1099	0	1218	133	14	FALSE	FALSE	FALSE	FALSE	FALSE	FALSE	FALSE	FALSE	FALSE	FALSE	FALSE	FALSE	FALSE	FALSE	FALSE	FALSE	FALSE
1254	1254_1	Male	60	-	CAUCASIAN	IV	IV	UNKNOWN	POOR	FALSE	GEJ	ADENOCARCINOMA	PROXIMAL	3	3.14	2	0.6925	3	2	Yes	1	0	0	0	1	2+		22	0	185	185	22	FALSE	FALSE	FALSE	FALSE	FALSE	FALSE	FALSE	FALSE	FALSE	FALSE	FALSE	FALSE	TRUE	TRUE	FALSE	FALSE	FALSE
1256	1256_1	Male	41	UNKNOWN	CAUCASIAN	IV	IV	UNKNOWN	UNKNOWN	FALSE	GEJ	ADENOCARCINOMA	PROXIMAL	1		2	0.265885	1	2	Yes	1	0	0	0	1	2+		-11	0	150	150	-11	TRUE	TRUE	FALSE	FALSE	FALSE	FALSE	FALSE	FALSE	FALSE	FALSE	FALSE	FALSE	FALSE	FALSE	FALSE	FALSE	FALSE
1274	1274_1	Male	54	-	AFRICAN AMERICAN	IV	IV	UNKNOWN	UNKNOWN	FALSE	GEJ	ADENOCARCINOMA	PROXIMAL	4	3	1	6.45683	4	1	Yes	1	1	1	0	1	1		0	1	90	90	0	TRUE	FALSE	TRUE	FALSE	FALSE	FALSE	FALSE	FALSE	FALSE	FALSE	FALSE	FALSE	FALSE	FALSE	FALSE	FALSE	FALSE
1282	1282_1	Male	62	-	CAUCASIAN	IV	IV	UNKNOWN	MODERATE	FALSE	GEJ	ADENOCARCINOMA	PROXIMAL	7	1	1	42.5969	7	1	Yes	1	1	0	0	1	1	0.100005	-5	0	121	121	-5	FALSE	FALSE	FALSE	FALSE	FALSE	FALSE	FALSE	FALSE	FALSE	TRUE	FALSE	TRUE	TRUE	FALSE	TRUE	FALSE	FALSE
1296	1296_1	Male	62	-	CAUCASIAN	IV	IV	UNKNOWN	MODERATE	FALSE	ESOPHAGEAL	ADENOCARCINOMA	PROXIMAL	5	2	1	1.75492	5	1	Yes	1	1	0	0	1	1	1.29958	3	0	140	140	3	FALSE	FALSE	FALSE	FALSE	FALSE	FALSE	FALSE	FALSE	FALSE	TRUE	FALSE	TRUE	FALSE	FALSE	FALSE	FALSE	FALSE
1299	1299_1	Male	85	UNKNOWN	CAUCASIAN	IV	IV	UNKNOWN	POOR	FALSE	ESOPHAGEAL	ADENOCARCINOMA	PROXIMAL	1		1	0.0621118	1	1	Yes	0	0	1	0	1	1		9	0	142	142	9	FALSE	FALSE	FALSE	FALSE	FALSE	FALSE	FALSE	FALSE	FALSE	FALSE	FALSE	FALSE	FALSE	FALSE	FALSE	FALSE	FALSE
1339	1339_1	Female	67	-	CAUCASIAN	IV	IV	UNKNOWN	POOR	FALSE	GASTRIC	ADENOCARCINOMA	DISTAL	2		1	0.238775	2	1	Yes	1	0	1	0	1	1		30	0	146	146	30	FALSE	FALSE	FALSE	FALSE	FALSE	FALSE	FALSE	FALSE	FALSE	FALSE	FALSE	FALSE	FALSE	FALSE	FALSE	FALSE	FALSE
1353	1353_1	Male	60	-	CAUCASIAN	IV	IV	UNKNOWN	UNKNOWN	FALSE	GEJ	ADENOCARCINOMA	PROXIMAL	8	4	1	10.6525	5	1	Yes	1	1	1	0	1	1		13	0	108	108	13	FALSE	FALSE	FALSE	TRUE	FALSE	TRUE	TRUE	FALSE	TRUE	TRUE	FALSE	TRUE	FALSE	FALSE	FALSE	FALSE	FALSE
1363	1363_1	Female	66	-	OTHER/UNKNOWN	IV	IV	UNKNOWN	WELL	FALSE	GASTRIC	ADENOCARCINOMA	DISTAL	9	8	1	24.316	9	1	Yes	1	0	1	0	1	1		13	0	104	104	13	TRUE	TRUE	FALSE	FALSE	FALSE	FALSE	FALSE	FALSE	FALSE	FALSE	FALSE	FALSE	TRUE	TRUE	FALSE	FALSE	FALSE
1367	1367_1	Male	57	+	CAUCASIAN	IV	IV	UNKNOWN	POOR	FALSE	ESOPHAGEAL	ADENOCARCINOMA	PROXIMAL	6	6.32	1	1.8108	5	1	Yes	1	0	0	0	1	1		13	0	109	109	13	FALSE	FALSE	FALSE	FALSE	FALSE	FALSE	FALSE	FALSE	FALSE	FALSE	FALSE	FALSE	FALSE	FALSE	FALSE	FALSE	FALSE
1394	1394_1	Female	66	UNKNOWN	CAUCASIAN	IV	IV	UNKNOWN	POOR	FALSE	GASTRIC	ADENOCARCINOMA	DISTAL	7	4	1	12.679	7	1	Yes	1	1	0	0	1	1		27	0	109	109	27	FALSE	FALSE	FALSE	FALSE	FALSE	FALSE	TRUE	FALSE	TRUE	FALSE	FALSE	FALSE	FALSE	FALSE	FALSE	FALSE	FALSE
1402	1402_1	Male	56	-	AFRICAN AMERICAN	IV	IV	UNKNOWN	POOR	FALSE	GASTRIC	ADENOCARCINOMA	DISTAL	4	1	1	9.10426	4	1	Yes	1	1	0	0	1	1	0.248976	10	0	87	87	10	FALSE	FALSE	FALSE	TRUE	FALSE	TRUE	FALSE	FALSE	FALSE	FALSE	FALSE	FALSE	FALSE	FALSE	FALSE	FALSE	FALSE
1404	1404_1	Female	52	-	ASIAN	IV	IV		POOR	TRUE	GASTRIC	ADENOCARCINOMA	DISTAL	0		1		0	1	No	0	0	0	0	1	1		0	0	1363	1363	0	FALSE	FALSE	FALSE	FALSE	FALSE	FALSE	FALSE	FALSE	FALSE	FALSE	FALSE	FALSE	FALSE	FALSE	FALSE	FALSE	FALSE
1417	1417_1	Male	71	-	ASIAN	IV	IV		POOR	FALSE	GASTRIC	ADENOCARCINOMA	DISTAL	0		1		0	1	No	0	0	0	0	1	1		0	0	1135	1135	0	FALSE	FALSE	FALSE	FALSE	FALSE	FALSE	FALSE	FALSE	FALSE	FALSE	FALSE	FALSE	FALSE	FALSE	FALSE	FALSE	FALSE
1420	1420_1	Female	31	-	ASIAN	IV	IV		UNKNOWN	FALSE	GASTRIC	ADENOCARCINOMA	DISTAL	0		1		0	1	No	0	0	0	0	1	1		24	1	79	79	24	FALSE	FALSE	FALSE	FALSE	FALSE	FALSE	FALSE	FALSE	FALSE	FALSE	FALSE	FALSE	FALSE	FALSE	FALSE	FALSE	FALSE
1427	1427_1	Female	44	-	ASIAN	IV	IV		UNKNOWN	TRUE	GASTRIC	ADENOCARCINOMA	DISTAL	0		1		0	1	No	0	0	0	0	1	1		0	1	501	501	0	FALSE	FALSE	FALSE	FALSE	FALSE	FALSE	FALSE	FALSE	FALSE	FALSE	FALSE	FALSE	FALSE	FALSE	FALSE	FALSE	FALSE
1432	1432_1	Female	39	-	ASIAN	IV	IV		UNKNOWN	TRUE	GASTRIC	ADENOCARCINOMA	DISTAL	0		1		0	1	No	0	0	0	0	1	1		31	0	1149	1149	31	FALSE	FALSE	FALSE	FALSE	FALSE	FALSE	FALSE	FALSE	FALSE	FALSE	FALSE	FALSE	FALSE	FALSE	FALSE	FALSE	FALSE
1435	1435_1	Female	52	-	ASIAN	IV	IV		POOR	FALSE	GASTRIC	ADENOCARCINOMA	DISTAL	0		1		0	1	No	0	0	0	0	1	1		36	1	282	282	36	FALSE	FALSE	FALSE	FALSE	FALSE	FALSE	FALSE	FALSE	FALSE	FALSE	FALSE	FALSE	FALSE	FALSE	FALSE	FALSE	FALSE
1447	1447_1	Male	68	-	ASIAN	IV	IV		UNKNOWN	FALSE	GASTRIC	ADENOCARCINOMA	DISTAL	0		1		0	1	No	0	0	0	0	1	1		8	1	487	487	8	FALSE	FALSE	FALSE	FALSE	FALSE	FALSE	FALSE	FALSE	FALSE	FALSE	FALSE	FALSE	FALSE	FALSE	FALSE	FALSE	FALSE
0293	0293_1	Male	49	-	CAUCASIAN	IV	IV	UNKNOWN	MODERATE	FALSE	ESOPHAGEAL	ADENOCARCINOMA	PROXIMAL	0		5		0	5	No	0	0	0	0	1	2+		22	1	546	546	22	FALSE	FALSE	FALSE	FALSE	FALSE	FALSE	FALSE	FALSE	FALSE	FALSE	FALSE	FALSE	FALSE	FALSE	FALSE	FALSE	FALSE
1495	1495_1	Female	37	-	ASIAN	IV	IV		POOR	TRUE	GASTRIC	ADENOCARCINOMA	DISTAL	0		1		0	1	No	0	0	0	0	1	1		40	0	621	621	40	FALSE	FALSE	FALSE	FALSE	FALSE	FALSE	FALSE	FALSE	FALSE	FALSE	FALSE	FALSE	FALSE	FALSE	FALSE	FALSE	FALSE
1506	1506_1	Male	68	-	ASIAN	IV	IV		WELL	FALSE	GASTRIC	ADENOCARCINOMA	DISTAL	0		1		0	1	No	0	0	0	0	1	1		21	0	491	491	21	FALSE	FALSE	FALSE	FALSE	FALSE	FALSE	FALSE	FALSE	FALSE	FALSE	FALSE	FALSE	FALSE	FALSE	FALSE	FALSE	FALSE
1517	1517_1	Male	40	-	ASIAN	IV	IV		MODERATE	FALSE	GASTRIC	ADENOCARCINOMA	DISTAL	0		1		0	1	No	0	0	0	0	1	1		0	0	211	211	0	FALSE	FALSE	FALSE	FALSE	FALSE	FALSE	FALSE	FALSE	FALSE	FALSE	FALSE	FALSE	FALSE	FALSE	FALSE	FALSE	FALSE
1522	1522_1	Male	50	-	ASIAN	IV	IV		POOR	FALSE	GASTRIC	ADENOCARCINOMA	DISTAL	0		1		0	1	No	0	0	0	0	1	1		27	0	188	188	27	FALSE	FALSE	FALSE	FALSE	FALSE	FALSE	FALSE	FALSE	FALSE	FALSE	FALSE	FALSE	FALSE	FALSE	FALSE	FALSE	FALSE
1546	1546_1	Male	32	Equivocal	CAUCASIAN	IV	IV	UNKNOWN	POOR	FALSE	ESOPHAGEAL	ADENOCARCINOMA	PROXIMAL	0		1		0	1	No	0	0	0	0	1	1		9	1	327	327	9	FALSE	FALSE	FALSE	FALSE	FALSE	FALSE	FALSE	FALSE	FALSE	FALSE	FALSE	FALSE	FALSE	FALSE	FALSE	FALSE	FALSE
0959	0959_1	Female	83	+	AFRICAN AMERICAN	I	IV	I	UNKNOWN	TRUE	GASTRIC	ADENOCARCINOMA	DISTAL	0		2		0	2	No	0	0	0	0	1	2+		1086	0	1442	343	-13	FALSE	FALSE	FALSE	FALSE	FALSE	FALSE	FALSE	FALSE	FALSE	FALSE	FALSE	FALSE	FALSE	FALSE	FALSE	FALSE	FALSE
1567	1567_1	Male	59	-	CAUCASIAN	IV	IV	UNKNOWN	POOR	FALSE	GASTRIC	ADENOCARCINOMA	DISTAL	0		2		0	2	No	0	0	0	0	1	2+		11	0	301	301	11	FALSE	FALSE	FALSE	FALSE	FALSE	FALSE	FALSE	FALSE	FALSE	FALSE	FALSE	FALSE	FALSE	FALSE	FALSE	FALSE	FALSE
1577	1577_1	Male	41	Equivocal	CAUCASIAN	IV	IV	UNKNOWN	POOR	FALSE	GASTRIC	ADENOCARCINOMA	DISTAL	0		2		0	2	No	0	0	0	0	1	2+		2	1	170	170	2	FALSE	FALSE	FALSE	FALSE	FALSE	FALSE	FALSE	FALSE	FALSE	FALSE	FALSE	FALSE	FALSE	FALSE	FALSE	FALSE	FALSE
1591	1591_1	Male	47	+	CAUCASIAN	III	IV	UNKNOWN	WELL	TRUE	GEJ	ADENOCARCINOMA	PROXIMAL	0		1		0	1	No	0	0	0	0	1	1		1086	0	1301	260	45	FALSE	FALSE	FALSE	FALSE	FALSE	FALSE	FALSE	FALSE	FALSE	FALSE	FALSE	FALSE	FALSE	FALSE	FALSE	FALSE	FALSE
1603	1603_1	Male	52	-	AFRICAN AMERICAN	IV	IV	UNKNOWN	WELL	FALSE	GASTRIC	ADENOCARCINOMA	DISTAL	0		2		0	2	No	0	0	0	0	1	2+		20	0	209	209	20	FALSE	FALSE	FALSE	FALSE	FALSE	FALSE	FALSE	FALSE	FALSE	FALSE	FALSE	FALSE	FALSE	FALSE	FALSE	FALSE	FALSE
1606	1606_1	Male	72	UNKNOWN	CAUCASIAN	IV	IV	IV	POOR	FALSE	ESOPHAGEAL	ADENOCARCINOMA	PROXIMAL	0		1		0	1	No	0	0	0	0	1	1		10	0	162	162	10	FALSE	FALSE	FALSE	FALSE	FALSE	FALSE	FALSE	FALSE	FALSE	FALSE	FALSE	FALSE	FALSE	FALSE	FALSE	FALSE	FALSE
1621	1621_1	Female	69	-	CAUCASIAN	IV	IV	UNKNOWN	POOR	FALSE	GASTRIC	ADENOCARCINOMA	DISTAL	0		1		0	1	No	0	0	0	0	1	1		12	0	134	134	12	FALSE	FALSE	FALSE	FALSE	FALSE	FALSE	FALSE	FALSE	FALSE	FALSE	FALSE	FALSE	FALSE	FALSE	FALSE	FALSE	FALSE
0315	0315_1	Male	39	+	CAUCASIAN	IV	IV	UNKNOWN	UNKNOWN	FALSE	GASTRIC	ADENOCARCINOMA	DISTAL	3	1	1	10.87	3	1	Yes	1	1	0	0	1	1		9	1	101	101	9	TRUE	TRUE	FALSE	FALSE	FALSE	FALSE	FALSE	FALSE	FALSE	FALSE	FALSE	FALSE	FALSE	FALSE	FALSE	TRUE	FALSE
0389	0389_1	Male	48	+	HISPANIC	IV	IV	UNKNOWN	POOR	FALSE	GASTRIC	ADENOCARCINOMA	DISTAL	6	1	8	27.21	6	12	Yes	1	1	0	0	1	2+	0.0891636	31	1	837	837	31	FALSE	FALSE	FALSE	FALSE	FALSE	FALSE	FALSE	FALSE	FALSE	TRUE	FALSE	TRUE	TRUE	FALSE	TRUE	FALSE	FALSE
0457	0457_1	Male	49	7	CAUCASIAN	IV	IV	UNKNOWN	MODERATE	FALSE	ESOPHAGEAL	ADENOCARCINOMA	PROXIMAL	4	3	4	2.8	4	4	Yes	1	1	0	0	1	2+		21	1	260	260	21	FALSE	FALSE	FALSE	FALSE	FALSE	FALSE	FALSE	FALSE	FALSE	FALSE	FALSE	FALSE	FALSE	FALSE	FALSE	FALSE	FALSE
0514	0514_1	Male	57	-	CAUCASIAN	IV	IV	UNKNOWN	POOR	FALSE	GEJ	ADENOCARCINOMA	PROXIMAL	2	2.64201	3	0.2	2	6	Yes	1	0	0	0	1	2+		22	1	705	705	22	FALSE	FALSE	FALSE	FALSE	FALSE	FALSE	FALSE	FALSE	FALSE	FALSE	FALSE	FALSE	FALSE	FALSE	FALSE	FALSE	FALSE
0844	0844_1	Male	56	+	CAUCASIAN	II	IV	II	POOR	TRUE	GEJ	ADENOCARCINOMA	PROXIMAL	8	2	1	34.1287	8	2	Yes	1	1	0	0	1	1	0.0693131	705	1	961	290	34	TRUE	FALSE	TRUE	FALSE	FALSE	FALSE	FALSE	FALSE	FALSE	TRUE	FALSE	TRUE	FALSE	FALSE	FALSE	TRUE	FALSE
0885	0885_1	Male	55	+	CAUCASIAN	IV	IV	UNKNOWN	POOR	FALSE	ESOPHAGEAL	ADENOCARCINOMA	PROXIMAL	6	3	1	18.4205	6	1	Yes	1	1	0	0	1	1	1.15404	14	1	324	324	14	TRUE	FALSE	TRUE	FALSE	FALSE	FALSE	FALSE	FALSE	FALSE	FALSE	FALSE	FALSE	FALSE	FALSE	FALSE	TRUE	FALSE
1156	1156_1	Male	76	-	OTHER/UNKNOWN	IV	IV	UNKNOWN	POOR	FALSE	GEJ	ADENOCARCINOMA	PROXIMAL	4	4.2	1	0.566976	4	1	Yes	1	0	0	0	1	1		13	1	214	214	13	FALSE	FALSE	FALSE	FALSE	FALSE	FALSE	FALSE	FALSE	FALSE	FALSE	FALSE	FALSE	FALSE	FALSE	FALSE	TRUE	TRUE
1395	1395_1	Female	28	+	AFRICAN AMERICAN	IV	IV	UNKNOWN	POOR	FALSE	GASTRIC	ADENOCARCINOMA	DISTAL	10	6	1	19.3176	9	1	Yes	1	1	0	0	1	1	0.119126	13	0	90	90	13	FALSE	FALSE	FALSE	TRUE	FALSE	TRUE	FALSE	FALSE	FALSE	FALSE	FALSE	FALSE	TRUE	TRUE	FALSE	TRUE	TRUE
0075	0075_1	Male	57	-	ASIAN	IV	IV		POOR	FALSE	GASTRIC	ADENOCARCINOMA	DISTAL	5	3	1	9.05	5	1	Yes	1	0	0	0	1	1		0	1	109	109	0	FALSE	FALSE	FALSE	TRUE	TRUE	FALSE	FALSE	FALSE	FALSE	FALSE	FALSE	FALSE	TRUE	TRUE	FALSE	FALSE	FALSE
0076	0076_1	Female	24	+	ASIAN	IV	IV		POOR	FALSE	GASTRIC	ADENOCARCINOMA	DISTAL	3	3	1	1.56	3	1	Yes	1	0	0	0	1	1		0	1	313	313	0	FALSE	FALSE	FALSE	FALSE	FALSE	FALSE	FALSE	FALSE	FALSE	FALSE	FALSE	FALSE	TRUE	TRUE	FALSE	FALSE	FALSE
0080	0080_1	Male	53	+	ASIAN	IV	IV		MODERATE	FALSE	GASTRIC	ADENOCARCINOMA	DISTAL	5	4	1	44.14	3	1	Yes	1	1	0	0	1	1		19	1	298	298	19	FALSE	FALSE	FALSE	FALSE	FALSE	FALSE	FALSE	FALSE	FALSE	FALSE	FALSE	FALSE	FALSE	FALSE	FALSE	TRUE	FALSE
0099	0099_1	Male	24	Equivocal	ASIAN	IV	IV		UNKNOWN	FALSE	GASTRIC	ADENOCARCINOMA	DISTAL	4	2	1	8.33	4	1	Yes	1	1	0	0	1	1	0.476804	31	1	90	90	31	FALSE	FALSE	FALSE	FALSE	FALSE	FALSE	TRUE	FALSE	TRUE	FALSE	FALSE	FALSE	TRUE	TRUE	FALSE	TRUE	FALSE
0364	0364_1	Male	68	+	CAUCASIAN	IV	IV	UNKNOWN	POOR	FALSE	ESOPHAGEAL	ADENOCARCINOMA	PROXIMAL	7	2	4	59.44	7	4	Yes	1	1	0	0	1	2+		23	1	222	222	23	TRUE	FALSE	TRUE	TRUE	TRUE	FALSE	FALSE	FALSE	FALSE	FALSE	FALSE	FALSE	FALSE	FALSE	FALSE	TRUE	FALSE
0842	0842_1	Male	69	-	ASIAN	IV	IV		POOR	TRUE	GASTRIC	ADENOCARCINOMA	DISTAL	2	2.85768	1	0.422378	2	1	Yes	1	0	0	0	1	1		0	1	89	89	0	FALSE	FALSE	FALSE	FALSE	FALSE	FALSE	FALSE	FALSE	FALSE	FALSE	FALSE	FALSE	FALSE	FALSE	FALSE	FALSE	FALSE
0919	0919_1	Male	73	+	CAUCASIAN	III	IV	III	MODERATE	TRUE	ESOPHAGEAL	ADENOCARCINOMA	PROXIMAL	1		1	0.121435	1	1	Yes	1	0	0	0	1	1		364	1	551	222	35	FALSE	FALSE	FALSE	FALSE	FALSE	FALSE	FALSE	FALSE	FALSE	FALSE	FALSE	FALSE	FALSE	FALSE	FALSE	FALSE	FALSE
0022	0022_1	Female	80	+	ASIAN	IV	IV		MODERATE	FALSE	GASTRIC	ADENOCARCINOMA	DISTAL	3	2	1	2.32	3	1	Yes	1	1	0	0	1	1		14	1	380	380	14	FALSE	FALSE	FALSE	FALSE	FALSE	FALSE	FALSE	FALSE	FALSE	FALSE	FALSE	FALSE	FALSE	FALSE	FALSE	TRUE	FALSE
0198	0198_1	Male	57	Equivocal	ASIAN	IV	IV		POOR	FALSE	GASTRIC	ADENOCARCINOMA	DISTAL	3	1	1	3.08	3	1	Yes	1	1	0	0	1	1		9	1	478	478	9	FALSE	FALSE	FALSE	FALSE	FALSE	FALSE	FALSE	FALSE	FALSE	TRUE	TRUE	FALSE	FALSE	FALSE	FALSE	TRUE	FALSE
0214	0214_1	Male	66	+	ASIAN	IV	IV		WELL	TRUE	GASTRIC	ADENOCARCINOMA	DISTAL	3	1	1	8.76	2	1	Yes	1	1	0	0	1	1	1.38595	0	0	1066	1066	0	FALSE	FALSE	FALSE	FALSE	FALSE	FALSE	FALSE	FALSE	FALSE	FALSE	FALSE	FALSE	FALSE	FALSE	FALSE	TRUE	FALSE
0240	0240_1	Male	71	+	CAUCASIAN	IV	IV	IV	POOR	FALSE	GEJ	ADENOCARCINOMA	PROXIMAL	4	3	5	1.32	3	7	Yes	1	1	0	0	1	2+	2.71581	8	1	788	788	8	TRUE	FALSE	TRUE	FALSE	FALSE	FALSE	FALSE	FALSE	FALSE	FALSE	FALSE	FALSE	FALSE	FALSE	FALSE	FALSE	FALSE
0281	0281_1	Female	65	+	AFRICAN AMERICAN	III	IV	III	POOR	TRUE	GEJ	ADENOCARCINOMA	PROXIMAL	1		3	0	1	4	Yes	0	1	0	0	1	2+	261.389	510	0	1504	966	-28	FALSE	FALSE	FALSE	FALSE	FALSE	FALSE	FALSE	FALSE	FALSE	FALSE	FALSE	FALSE	FALSE	FALSE	FALSE	TRUE	FALSE
0468	0468_1	Male	72	+	AFRICAN AMERICAN	IV	IV	UNKNOWN	POOR	FALSE	GEJ	ADENOCARCINOMA	PROXIMAL	9	3	4	55.08	8	7	Yes	1	1	0	0	1	2+		35	1	283	283	35	FALSE	FALSE	FALSE	FALSE	FALSE	FALSE	FALSE	FALSE	FALSE	FALSE	FALSE	FALSE	TRUE	FALSE	TRUE	TRUE	FALSE
0482	0482_1	Male	78	+	CAUCASIAN	IV	IV	UNKNOWN	MODERATE	FALSE	GEJ	ADENOCARCINOMA	PROXIMAL	6	5.72704	2	0.63	5	2	Yes	1	1	0	0	1	2+		58	0	771	771	58	FALSE	FALSE	FALSE	FALSE	FALSE	FALSE	FALSE	FALSE	FALSE	FALSE	FALSE	FALSE	FALSE	FALSE	FALSE	TRUE	FALSE
0567	0567_1	Male	51	+	CAUCASIAN	IV	IV	UNKNOWN	MODERATE	FALSE	ESOPHAGEAL	ADENOCARCINOMA	PROXIMAL	3	2	3	6.62164	3	7	Yes	1	1	0	0	1	2+	3.47261	33	0	712	712	33	FALSE	FALSE	FALSE	FALSE	FALSE	FALSE	FALSE	FALSE	FALSE	FALSE	FALSE	FALSE	FALSE	FALSE	FALSE	TRUE	TRUE
0587	0587_1	Female	57	+	CAUCASIAN	IV	IV	UNKNOWN	WELL	FALSE	GEJ	ADENOCARCINOMA	PROXIMAL	4	2	2	13.0786	4	5	Yes	1	1	1	0	1	2+	0.254464	15	0	667	667	15	FALSE	FALSE	FALSE	FALSE	FALSE	FALSE	FALSE	FALSE	FALSE	FALSE	FALSE	FALSE	FALSE	FALSE	FALSE	TRUE	FALSE
0620	0620_1	Male	66	+	CAUCASIAN	IV	IV	UNKNOWN	MODERATE	FALSE	GEJ	ADENOCARCINOMA	PROXIMAL	1	1	2	0.672766	1	4	Yes	1	0	0	0	1	2+		27	0	643	643	27	FALSE	FALSE	FALSE	FALSE	FALSE	FALSE	FALSE	FALSE	FALSE	FALSE	FALSE	FALSE	FALSE	FALSE	FALSE	FALSE	FALSE
0742	0742_1	Male	65	+	CAUCASIAN	IV	IV	UNKNOWN	POOR	FALSE	ESOPHAGEAL	ADENOCARCINOMA	PROXIMAL	2	1	1	0.132328	2	1	Yes	1	1	0	0	1	1	122.519	10	1	63	63	10	FALSE	FALSE	FALSE	FALSE	FALSE	FALSE	FALSE	FALSE	FALSE	FALSE	FALSE	FALSE	FALSE	FALSE	FALSE	TRUE	FALSE
0794	0794_1	Male	61	+	ASIAN	IV	IV		MODERATE	FALSE	GASTRIC	ADENOCARCINOMA	DISTAL	6	5	1	1.91158	5	1	Yes	1	1	0	0	1	1		0	1	113	113	0	FALSE	FALSE	FALSE	FALSE	FALSE	FALSE	FALSE	FALSE	FALSE	FALSE	FALSE	FALSE	FALSE	FALSE	FALSE	TRUE	FALSE
0646	0646_4	Male	57	+	CAUCASIAN	III	IV	UNKNOWN	MODERATE	TRUE	ESOPHAGEAL	ADENOCARCINOMA	PROXIMAL	6	4	6	66.6739	6	6	Yes	1	1	1	0	4	2+		339	0	584	244	-1	FALSE	FALSE	FALSE	FALSE	FALSE	FALSE	FALSE	FALSE	FALSE	FALSE	FALSE	FALSE	FALSE	FALSE	FALSE	TRUE	TRUE
1012	1012_1	Female	29	+	CAUCASIAN	IV	IV	UNKNOWN	MODERATE	FALSE	GEJ	ADENOCARCINOMA	PROXIMAL	7		2	57.7527	7	2	Yes	1	1	0	0	1	2+		14	1	261	261	14	FALSE	FALSE	FALSE	FALSE	FALSE	FALSE	FALSE	FALSE	FALSE	FALSE	FALSE	FALSE	TRUE	FALSE	TRUE	TRUE	FALSE
1090	1090_1	Male	54	+	CAUCASIAN	IV	IV	UNKNOWN	POOR	FALSE	GEJ	ADENOCARCINOMA	PROXIMAL	8	1	2	12.631	8	2	Yes	1	1	0	0	1	2+		14	0	294	294	14	FALSE	FALSE	FALSE	FALSE	FALSE	FALSE	TRUE	FALSE	TRUE	FALSE	FALSE	FALSE	TRUE	FALSE	TRUE	TRUE	FALSE
1366	1366_1	Female	59	+	CAUCASIAN	IV	IV	UNKNOWN	POOR	FALSE	GASTRIC	ADENOCARCINOMA	DISTAL	4	3	1	2.0948	4	1	Yes	1	1	0	0	1	1		29	0	114	114	29	FALSE	FALSE	FALSE	FALSE	FALSE	FALSE	TRUE	FALSE	TRUE	FALSE	FALSE	FALSE	FALSE	FALSE	FALSE	FALSE	FALSE
[truncated: 28 more columns]

## Sheet: S3 - Perioperative Detection
PtID	Treatment Status	Time From Resection	Clinical Stage	Path Stage (7th Edition)	Primary Site	maxVAF	ctDNA detected?	DFS (days)	recurcensor
0114	Pretreatment	-89	III	I	PROXIMAL	0.61	Detected	302	1
0239	Pretreatment	-90	II	0	DISTAL	2.34	Detected	904	0
0538	Pretreatment	-110	III	IIIA	PROXIMAL	2.11	Detected	296	1
0552	Pretreatment	-100	III	IIB	PROXIMAL	12.66	Detected	526	0
0575	Pretreatment	-159	III	IIB	PROXIMAL	2.52394	Detected	329	1
0605	Pretreatment	-103	III	I	PROXIMAL	1.55875	Detected	456	1
0646	Pretreatment	-104	III	IIB	PROXIMAL	2.57829	Detected	226	1
0647	Pretreatment	-174	III	IB	PROXIMAL	3.04635	Detected	393	0
0651	Pretreatment	-103	III	IA	PROXIMAL	2.96875	Detected	443	0
0781	Pretreatment	-118	II	IIB	DISTAL	1.77404	Detected	331	0
0982	Pretreatment	-117	III	IIIC	DISTAL	1.70257	Detected	128	0
1066	Pretreatment	-110	III	IIB	PROXIMAL	0.264883	Detected	121	0
1231	Pretreatment	-110	II	I	PROXIMAL	0.915587	Detected	59	0
1259	Pretreatment	-131	III	IB	PROXIMAL	0.431371	Detected	45	0
1286	Pretreatment	-118	II	II	PROXIMAL	2.1021	Detected	14	0
1296	Pretreatment	-153	IV	IB	PROXIMAL	1.75492	Detected	0	0
1316	Pretreatment	-137	III	IIIB	PROXIMAL	1.65353	Detected	7	0
0252	Pretreatment	-94	III	I	PROXIMAL	0.2	Not Detected	847	0
0380	Pretreatment	-116	III	IIIC	DISTAL		Not Detected	714	0
0653	Pretreatment	-102	III	IIIB	DISTAL	0.224563	Not Detected	430	0
0745	Pretreatment	-101	II	IIIB	PROXIMAL	0.0939999	Not Detected	381	0
1155	Pretreatment	-25	I	IB	PROXIMAL	0.205058	Not Detected	129	0
1162	Pretreatment	-114	III	IV	PROXIMAL	0.119385	Not Detected	99	0
1352	Pretreatment	-120	II	IIIC	DISTAL	0.178194	Not Detected	125	0
0127	Pretreatment	-80	II	IA	PROXIMAL		Not Detected	1043	0
1478	Pretreatment	-90	III	IIIC	PROXIMAL		Not Detected	589	0
0608	Pretreatment	-153	IV	IV	DISTAL		Not Detected	198	1
1049	Pretreatment	-117	III	I	PROXIMAL		Not Detected	142	0
1623	Pretreatment	-106	III	IIIC	DISTAL		Not Detected	0	0
1067	Post-Resection	36	I	I	DISTAL	0.311569	Detected	36	0
0538	Post-Resection	44	III	IIIA	PROXIMAL	0.287822	Detected	296	1
0380	Post-Resection	45	III	IIIC	DISTAL	0.4	Detected	714	0
0608	Post-Resection	57	IV	IV	DISTAL	0.354686	Detected	198	1
0646	Post-Resection	64	III	IIB	PROXIMAL	6.97346	Detected	226	1
0647	Post-Resection	106	III	IB	PROXIMAL	4.11347	Detected	393	0
0605	Post-Resection	135	III	I	PROXIMAL	1.88457	Detected	456	1
1618	Post-Resection	20	I	IV	DISTAL		Not Detected	34	0
0552	Post-Resection	22	III	IIB	PROXIMAL		Not Detected	526	0
0982	Post-Resection	30	III	IIIC	DISTAL		Not Detected	128	0
1621	Post-Resection	33	IV	IV	DISTAL		Not Detected	155	0
1584	Post-Resection	34	I	I	DISTAL		Not Detected	258	0
0924	Post-Resection	38	I	I	PROXIMAL	0.168829	Not Detected	417	0
1153	Post-Resection	45	II	IIB	PROXIMAL	0.074738	Not Detected	248	0
0668	Post-Resection	50	II	II	DISTAL	0.131035	Not Detected	582	0
1478	Post-Resection	50	III	IIIC	PROXIMAL		Not Detected	589	0
1066	Post-Resection	51	III	IIB	PROXIMAL	0.215968	Not Detected	121	0
1049	Post-Resection	51	III	I	PROXIMAL		Not Detected	142	0
0651	Post-Resection	58	III	IA	PROXIMAL		Not Detected	443	0
0653	Post-Resection	59	III	IIIB	DISTAL	0.125071	Not Detected	430	0
0114	Post-Resection	68	III	I	PROXIMAL	0.21	Not Detected	302	1
0916	Post-Resection	101	I	IA	PROXIMAL	0.149841	Not Detected	472	0
ctDNA Detected indicates >0.25% VAF detected in ctDNA
recurcensor: 1=recurred/died

## Sheet: S4 - MRDalts
PtID	TestID	Timing	Time from Resection	maxVAF	DFS	recurcensor	Residual Disease?*	Gene	Alteration
0239	0239_1	Baseline	-90	2.34	904	0	Detected	FGFR1	N65S
0552	0552_1	Baseline	-100	12.66	526	0	Detected	TP53	R273H
0651	0651_1	Baseline	-103	2.96875	443	0	Detected	TP53	R248Q
0781	0781_1	Baseline	-118	1.77404	331	0	Detected	ALK	V1049I
0982	0982_1	Baseline	-117	1.70257	128	0	Detected	ARID1A	p.Leu1769dup
1066	1066_1	Baseline	-110	0.264883	121	0	Detected	SMAD4	G386V
1231	1231_1	Baseline	-110	0.915587	59	0	Detected	EGFR	V592I
1259	1259_1	Baseline	-131	0.431371	45	0	Detected	NF1	R262H
1296	1296_1	Baseline	-153	1.75492	0	0	Detected	TP53	W146*
0114	0114_1	Baseline	-89	0.61	302	1	Detected	ERBB2	G776V
0538	0538_1	Baseline	-110	2.11	296	1	Detected	RB1	T5P
0575	0575_1	Baseline	-159	2.52394	329	1	Detected	TP53	R248Q
0605	0605_1	Baseline	-103	1.55875	456	1	Detected	TP53	R282W
0646	0646_1	Baseline	-104	2.57829	226	1	Detected	ERBB2	S310F
0252	0252_1	Baseline	-94	0.2	847	0	Not Detected	MET	R1005Q
0653	0653_1	Baseline	-102	0.224563	430	0	Not Detected	PTEN	M35V
0745	0745_1	Baseline	-101	0.0939999	381	0	Not Detected	MET	G801E
1155	1155_1	Baseline	-25	0.205058	129	0	Not Detected	EGFR	V765M
1162	1162_1	Baseline	-114	0.119385	99	0	Not Detected	TP53	Y220C
1352	1352_1	Baseline	-120	0.178194	125	0	Not Detected	TP53	D281H
0380	0380_2	Post-Op	45	0.4	714	0	Detected	TP53	H214R
1067	1067_1	Post-Op	36	0.311569	36	0	Detected	EGFR	V592I
0647	0647_3	Post-Op	106	4.11347	393	0	Detected	BRCA2	N30N
0538	0538_2	Post-Op	44	0.287822	296	1	Detected	MTOR	R1080H
0605	0605_2	Post-Op	135	1.88457	456	1	Detected	TP53	F134L
0608	0608_3	Post-Op	57	0.354686	198	1	Detected	ARAF	N217K
0646	0646_2	Post-Op	64	6.97346	226	1	Detected	ERBB2	S310F
0653	0653_3	Post-Op	59	0.125071	430	0	Not Detected	APC	p.Ser2774fs
0668	0668_1	Post-Op	50	0.131035	582	0	Not Detected	FGFR1	T552M
0916	0916_1	Post-Op	101	0.149841	472	0	Not Detected	BRCA2	V2975I
0924	0924_1	Post-Op	38	0.168829	417	0	Not Detected	NOTCH1	R1608C
1066	1066_3	Post-Op	51	0.215968	121	0	Not Detected	FGFR3	V306I
1153	1153_1	Post-Op	45	0.074738	248	0	Not Detected	NF1	p.Asn697fs
0114	0114_2	Post-Op	68	0.21	302	1	Not Detected	ARID1A	M967T
				* Residual disease defined as 0.25% maxVAF or higher in order to maintain sensitivity and mitigate interference by clonal hematopoeisis.

## Sheet: S5A - GAs all cases by Global
gene	Global	Uchicago	Samsung	Uchicago (Distal Only) (%)
TP53	53.4726	53.4799	43.75	47.7778
EGFR	16.9023	17.9487	13.5417	14.4444
ERBB2	16.6564	19.7802	21.875	15.5556
KRAS	14.9355	15.3846	7.29167	16.6667
PIK3CA	13.3374	16.1172	13.5417	11.1111
MYC	13.0916	15.0183	11.4583	14.4444
ARID1A	11.6974	16.5385	7.35294	20.9302
MET	11.1862	12.8205	15.625	16.6667
CCNE1	10.2988	11.9231	16.1765	3.48837
APC	9.95698	11.3553	11.4583	14.4444
NF1	9.83405	8.42491	7.29167	11.1111
FGFR2	8.85065	10.989	10.4167	11.1111
CDK6	8.70947	9.23077	7.35294	11.6279
CDKN2A	6.88384	6.95971	2.08333	5.55556
BRAF	6.63798	7.69231	6.25	7.77778
SMAD4	6.14628	7.69231	6.25	6.66667
FGFR1	5.65458	7.69231	5.20833	6.66667
BRCA2	5.59441	4.61538	2.94118	1.16279
KIT	5.2858	5.86081	9.375	5.55556
PDGFRA	5.22434	5.49451	7.29167	3.33333
AR	5.03995	6.95971	5.20833	6.66667
RAF1	4.70439	5.76923	4.41176	6.97674
GNAS	4.3024	5.12821	4.16667	7.77778
PTEN	4.17947	5.12821	3.125	8.88889
CCND1	4.00509	4.23077	1.47059
BRCA1	3.87794	5	8.82353	6.97674
ERBB4	3.7037		3.57143
NOTCH1	3.38045	1.4652	5.20833
ATM	2.95022	4.0293	2.08333	4.44444
MTOR	2.74112	5.42169		3.77358
CTNNB1	2.70436	2.1978	5.20833	4.44444
CCND2	2.67006	4.61538	1.47059	2.32558
RHOA	2.60648	3.46154	2.94118	6.97674
FBXW7	2.33559	3.2967	3.125	3.33333
ALK	2.08974	3.2967	3.125	4.44444
CDH1	2.02827	1.8315		4.44444
CDK4	1.97076	0.384615	1.47059
KDR	1.85185		3.57143
STK11	1.84388	2.5641	1.04167	1.11111
TERT	1.59803	1.0989	1.04167	2.22222
NRAS	1.53657	1.8315	1.04167	1.11111
RB1	1.47511	1.8315	1.04167	1.11111
ESR1	1.33503	1.15385	1.47059	1.16279
RET	1.16779	1.4652	1.04167	1.11111
NTRK1	1.09409	2.02429		1.25
FGFR3	1.04487	2.1978	2.08333	1.11111
TSC1	1.02115	1.21457
IDH2	0.921942		1.04167
MAP2K1	0.826446	0.769231	4.41176	1.16279
MAPK3	0.812183
JAK2	0.799017	0.3663
PTPN11	0.799017	0.732601	1.04167	1.11111
HRAS	0.799017	0.3663	1.04167
AKT1	0.676091	0.732601	2.08333	1.11111
SMO	0.614628	0.3663	1.04167
NTRK3	0.609137
IDH1	0.553165	0.732601
CDKN2B	0.510204	2.12766		3.0303
ARAF	0.508582	1.15385		1.16279
MAPK1	0.507614	0.60241
HNF1A	0.491703	0.3663
MLH1	0.491703
RIT1	0.44501	0.769231		1.16279
NFE2L2	0.43024
GATA3	0.381437
ROS1	0.381437	0.384615
VHL	0.368777	0.3663		1.11111
MAP2K2	0.317864	0.384615	1.47059
SRC	0.311526
DDR2	0.304569		5
GNA11	0.184388	0.3663	2.08333	1.11111
MPL	0.184388	0.3663	1.04167
JAK3	0.122926	0.3663	1.04167	1.11111
GNAQ	0.122926	0.3663
EZH2	0.0614628

## Sheet: S5B - Mts all cases by Global
gene	Global	Uchicago	Samsung	Uchicago (Distal Only) (%)
TP53	53.4726	53.4799	43.75	47.7778
ARID1A	11.6974	16.5385	7.35294	20.9302
APC	9.95698	11.3553	11.4583	14.4444
NF1	9.83405	8.42491	7.29167	11.1111
PIK3CA	8.17455	8.42491	11.4583	7.77778
EGFR	7.86724	8.42491	6.25	6.66667
ERBB2	7.62139	8.42491	7.29167	12.2222
KRAS	7.06822	8.05861	4.16667	13.3333
CDKN2A	6.88384	6.95971	2.08333	5.55556
SMAD4	6.14628	7.69231	6.25	6.66667
BRCA2	5.59441	4.61538	2.94118	1.16279
MET	5.03995	6.22711	8.33333	7.77778
KIT	4.3024	4.0293	8.33333	5.55556
GNAS	4.3024	5.12821	4.16667	7.77778
FGFR2	4.3024	4.7619	4.16667	6.66667
PTEN	4.17947	5.12821	3.125	8.88889
BRCA1	3.87794	5	8.82353	6.97674
AR	3.87216	3.663	5.20833	4.44444
PDGFRA	3.87216	3.663	4.16667	3.33333
ERBB4	3.7037		3.57143
NOTCH1	3.38045	1.4652	5.20833
BRAF	3.1346	2.5641	3.125	2.22222
ATM	2.95022	4.0293	2.08333	4.44444
MTOR	2.74112	5.42169		3.77358
CTNNB1	2.70436	2.1978	5.20833	4.44444
RHOA	2.60648	3.46154	2.94118	6.97674
FBXW7	2.33559	3.2967	3.125	3.33333
ALK	2.08974	3.2967	3.125	4.44444
FGFR1	2.08974	3.2967	2.08333	3.33333
MYC	2.02827	2.9304	4.16667	2.22222
CDH1	2.02827	1.8315		4.44444
KDR	1.85185		3.57143
STK11	1.84388	2.5641	1.04167	1.11111
TERT	1.59803	1.0989	1.04167	2.22222
NRAS	1.53657	1.8315	1.04167	1.11111
RB1	1.47511	1.8315	1.04167	1.11111
ESR1	1.33503	1.15385	1.47059	1.16279
CCND2	1.20788	2.30769	1.47059	2.32558
RET	1.10633	1.0989	1.04167	1.11111
NTRK1	1.09409	2.02429		1.25
CCNE1	1.08074	0.769231	4.41176	1.16279
CCND1	1.08074	0.769231	1.47059
TSC1	1.02115	1.21457
RAF1	1.01716	0.384615	1.47059	1.16279
IDH2	0.921942		1.04167
FGFR3	0.860479	1.4652	2.08333	1.11111
MAP2K1	0.826446	0.769231	4.41176	1.16279
MAPK3	0.812183
JAK2	0.799017	0.3663
PTPN11	0.799017	0.732601	1.04167	1.11111
HRAS	0.799017	0.3663	1.04167
CDK6	0.699301	0.769231	0	0
AKT1	0.676091	0.732601	2.08333	1.11111
SMO	0.614628	0.3663	1.04167
NTRK3	0.609137
IDH1	0.553165	0.732601
CDKN2B	0.510204	2.12766		3.0303
ARAF	0.508582	1.15385		1.16279
MAPK1	0.507614	0.60241
HNF1A	0.491703	0.3663
MLH1	0.491703
RIT1	0.44501	0.769231		1.16279
CDK4	0.44501	0	1.47059
NFE2L2	0.43024
GATA3	0.381437
ROS1	0.381437	0.384615
VHL	0.368777	0.3663		1.11111
MAP2K2	0.317864	0.384615	1.47059
SRC	0.311526
DDR2	0.304569		5
GNA11	0.184388	0.3663	2.08333	1.11111
MPL	0.184388	0.3663	1.04167
JAK3	0.122926	0.3663	1.04167	1.11111
GNAQ	0.122926	0.3663
EZH2	0.0614628

## Sheet: S5C - Amps all cases by Global
gene	Global	Uchicago	Samsung	Uchicago (Distal Only) (%)
MYC	11.9517	13.4615	11.7647	12.7907
ERBB2	11.3092	13.5531	15.625	5.55556
EGFR	10.8175	12.0879	7.29167	8.88889
CCNE1	9.3452	11.1538	11.7647	2.32558
KRAS	9.28163	8.84615	4.41176	4.65116
CDK6	8.20089	8.84615	7.35294	11.6279
MET	6.76091	7.69231	7.29167	10
PIK3CA	6.548	9.23077	4.41176	3.48837
FGFR2	5.27654	6.53846	8.82353	3.48837
FGFR1	3.94151	5.38462	4.41176	3.48837
BRAF	3.81437	5.38462	4.41176	5.81395
RAF1	3.68722	5.38462	2.94118	5.81395
CCND1	3.64697	4.04858	0
CCND2	1.67761	2.42915	0	0
CDK4	1.58932	0.384615	0
PDGFRA	1.46217	1.92308	4.41176	0
AR	1.27146	3.84615	0	2.32558
KIT	1.01716	1.92308	1.47059	0
APC
FBXW7
PTEN
VHL
TP53
ALK
SMAD4
CDH1
GNAS
NOTCH1
JAK2
ERBB4
CDKN2A
CTNNB1
IDH2
KDR
GNA11
PTPN11
NF1
BRCA1
RET
ATM
BRCA2
NRAS
MAP2K1
ARID1A
IDH1
AKT1
ESR1
CDKN2B
HRAS
STK11
SRC
FGFR3
RIT1
RHOA
MAP2K2
TERT
GATA3
SMO
JAK3
NFE2L2
RB1
MPL
NTRK1
HNF1A
ROS1
GNAQ
TSC1
EZH2
MLH1
ARAF
NTRK3
MAPK1
MTOR
MAPK3
DDR2

## Sheet: S5D - All cases GAs by cohort
GENE_SYMBOL	Guardant360	MSK Impact	TCGA
TP53	53.5	75	73
EGFR	16.9	8	10
ERBB2	16.7	32	28
KRAS	14.9	16	15
PIK3CA	13.3	8	13
MYC	13.1	8	23
ARID1A	11.7	13	14
MET	11.2	5	7
CCNE1	10.3	10	19
APC	10	5	16
NF1	9.8	5	8
FGFR2	8.9	5	5
CDK6	8.7	6	16
CDKN2A	6.9	16	26
BRAF	6.6	0.9	4
SMAD4	6.1	13	21
FGFR1	5.7	1.8	5
BRCA2	5.6	4	11
KIT	5.3	2.6	5
PDGFRA	5.2	0.6	5
AR	5	4	6
RAF1	4.7	1.8	3
GNAS	4.3	5	14
PTEN	4.2	4	9
CCND1	4	7	12
BRCA1	3.9	1.8	6
ERBB4	3.7	8	14
NOTCH1	3.4	5	7
ATM	3	3	10
MTOR	2.7	2.6	7
CTNNB1	2.7	2.3	8
CCND2	2.7	0.9	3
RHOA	2.6	4	4
FBXW7	2.3	4	8
ALK	2.1	4	6
CDH1	2	9	5
CDK4	2	1.2	4
KDR	1.9	2.1	3
STK11	1.8	1.8	4
TERT	1.6	2.1	12
NRAS	1.5	1.8	4
RB1	1.5	3	7
ESR1	1.3	1.2	5
RET	1.2	4	4
NTRK1	1.1	1.2	6
FGFR3	1	0.9	4
TSC1	1	2.3	5
IDH2	0.9	0.3	11
MAP2K1	0.8	1.2	3
MAPK3	0.8	0	1.5
HRAS	0.8	0.6	1.9
JAK2	0.8	1.5	9
PTPN11	0.8	0.3	5
AKT1	0.7	0.9	1.5
SMO	0.6	1.2	3
NTRK3	0.6	2.3	8
IDH1	0.6	1.2	2.6
CDKN2B	0.5	5	17
ARAF	0.5	1.5	4
MAPK1	0.5	0.9	1.9
HNF1A	0.5	0.9	1.9
MLH1	0.5	1.2	2.3
RIT1	0.4	1.2	4
NFE2L2	0.4	0.6	3
GATA3	0.4	1.2	5
ROS1	0.4	2.9	7
VHL	0.4	0.6	2.6
MAP2K2	0.3	0.9	2.6
SRC	0.3	0.9	5
DDR2	0.3	2.1	7
GNA11	0.2	0.3	3
MPL	0.2	0.6	1.9
GNAQ	0.1	0	2.6
JAK3	0.1	0.3	5
EZH2	0.1	1.2	5
ABL1	0	1.2	4
CSF1R	0	1.8	3
FLT3	0	0.3	6
NPM1	0	0.3	2.6
RHEB	0	1	4
SMARCB1	0	1.5	3

## Sheet: S6A Alterations only by Global
gene	Global	Uchicago	Samsung	Uchicago (Distal Only) (%)
TP53	65.4628	62.6609	60	59.7222
EGFR	20.6922	21.03	18.5714	18.0556
ERBB2	20.3913	23.176	30	19.4444
KRAS	18.2844	18.0258	10	20.8333
PIK3CA	16.3281	18.8841	18.5714	13.8889
MYC	16.0271	17.5966	15.7143	18.0556
ARID1A	14.2968	19.457	10	26.087
MET	13.6945	15.0215	21.4286	20.8333
CCNE1	12.5874	14.0271	22	4.34783
APC	12.1896	13.3047	15.7143	18.0556
NF1	12.0391	9.87124	10	13.8889
FGFR2	10.8352	12.8755	14.2857	13.8889
CDK6	10.6449	10.8597	10	14.4928
CDKN2A	8.42739	8.15451	2.85714	6.94444
BRAF	8.12641	9.01288	8.57143	9.72222
SMAD4	7.52445	9.01288	8.57143	8.33333
FGFR1	6.9225	9.01288	7.14286	8.33333
BRCA2	6.83761	5.42986	4	1.44928
KIT	6.47103	6.86695	12.8571	6.94444
PDGFRA	6.39579	6.43777	10	4.16667
AR	6.17005	8.15451	7.14286	8.33333
RAF1	5.74981	6.78733	6	8.69565
GNAS	5.26712	6.00858	5.71429	9.72222
PTEN	5.11663	6.00858	4.28571	11.1111
CCND1	4.8951	4.97738	2
ERBB4	4.7619		5
BRCA1	4.7397	5.88235	12	8.69565
NOTCH1	4.13845	1.71674	7.14286
ATM	3.61174	4.72103	2.85714	5.55556
MTOR	3.34988	6.33803		4.7619
CTNNB1	3.31076	2.57511	7.14286	5.55556
CCND2	3.2634	5.42986	2	2.89855
RHOA	3.1857	4.0724	4	8.69565
FBXW7	2.85929	3.86266	4.28571	4.16667
ALK	2.55831	3.86266	4.28571	5.55556
CDH1	2.48307	2.14592		5.55556
CDK4	2.4087	0.452489	2
KDR	2.38095		5
STK11	2.25734	3.00429	1.42857	1.38889
TERT	1.95636	1.28755	1.42857	2.77778
NRAS	1.88111	2.14592	1.42857	1.38889
RB1	1.80587	2.14592	1.42857	1.38889
ESR1	1.6317	1.35747	2	1.44928
RET	1.42965	1.71674	1.42857	1.38889
NTRK1	1.32509	2.39234		1.5873
FGFR3	1.27916	2.57511	2.85714	1.38889
TSC1	1.23675	1.43541
IDH2	1.12867		1.42857
MAP2K1	1.0101	0.904977	6	1.44928
MAPK3	0.992556
JAK2	0.978179	0.429185
PTPN11	0.978179	0.858369	1.42857	1.38889
HRAS	0.978179	0.429185	1.42857
AKT1	0.82769	0.858369	2.85714	1.38889
SMO	0.752445	0.429185	1.42857
NTRK3	0.744417
IDH1	0.677201	0.858369
CDKN2B	0.623701	2.53165		3.7037
ARAF	0.621601	1.35747		1.44928
MAPK1	0.620347	0.704225
HNF1A	0.601956	0.429185
MLH1	0.601956
RIT1	0.543901	0.904977		1.44928
NFE2L2	0.526712
GATA3	0.4662
ROS1	0.4662	0.452489
VHL	0.451467	0.429185		1.38889
MAP2K2	0.3885	0.452489	2
SRC	0.382409
DDR2	0.372208		7.14286
GNA11	0.225734	0.429185	2.85714	1.38889
MPL	0.225734	0.429185	1.42857
JAK3	0.150489	0.429185	1.42857	1.38889
GNAQ	0.150489	0.429185
EZH2	0.0752445

## Sheet: S6B - VAF>0.5% by Global
gene	Global	Uchicago	Samsung	Uchicago (Distal Only) (%)
TP53	76.4957	72.0238	70.9091	67.3077
EGFR	25	24.4048	20	23.0769
ERBB2	24.5726	26.1905	34.5455	19.2308
KRAS	22.0085	22.0238	12.7273	23.0769
PIK3CA	21.047	23.8095	23.6364	17.3077
MYC	20.7265	22.0238	18.1818	21.1538
ARID1A	18.011	24.0506	12.5	32.6531
MET	16.9872	17.2619	25.4545	23.0769
CCNE1	16.4641	16.4557	25	4.08163
APC	15.0641	17.8571	18.1818	23.0769
CDK6	14.2541	12.6582	10	14.2857
FGFR2	13.8889	14.881	16.3636	17.3077
NF1	13.3547	9.52381	12.7273	13.4615
CDKN2A	11.1111	11.3095	3.63636	9.61538
BRAF	10.4701	11.3095	9.09091	13.4615
SMAD4	8.86752	10.7143	10.9091	9.61538
FGFR1	8.86752	11.9048	9.09091	9.61538
AR	8.01282	10.119	9.09091	7.69231
PDGFRA	7.69231	8.33333	10.9091	5.76923
KIT	7.58547	8.92857	16.3636	7.69231
RAF1	7.40331	8.86076	5	10.2041
BRCA2	7.29282	5.6962	5	2.04082
PTEN	6.41026	6.54762	3.63636	11.5385
CCND1	6.29834	6.32911	2.5
GNAS	5.98291	7.7381	7.27273	13.4615
BRCA1	5.96685	8.22785	15	12.2449
CTNNB1	4.59402	3.57143	9.09091	7.69231
CCND2	3.9779	6.96203	2.5	4.08163
NOTCH1	3.95299	1.78571	9.09091
ATM	3.95299	4.7619	1.81818	5.76923
RHOA	3.8674	5.06329	2.5	12.2449
MTOR	3.69069	8.08081		6.89655
FBXW7	3.52564	5.35714	5.45455	5.76923
KDR	3.22581		6.66667
ERBB4	3.22581
CDK4	3.09392	0.632911	2.5
CDH1	2.99145	2.97619		7.69231
STK11	2.77778	3.57143	1.81818
ALK	2.67094	5.35714	5.45455	7.69231
TERT	2.5641	1.78571	1.81818	3.84615
NRAS	2.24359	2.38095	1.81818	1.92308
RB1	2.24359	2.38095	1.81818	1.92308
ESR1	1.87845	1.26582	2.5	2.04082
RET	1.81624	1.78571	1.81818	1.92308
MAP2K1	1.43646	1.26582	7.5	2.04082
FGFR3	1.38889	3.57143	1.81818	1.92308
NTRK1	1.37845	2
TSC1	1.37845	2
IDH2	1.06838		1.81818
SMO	1.06838	0.595238	1.81818
MAPK3	1.05448
JAK2	0.961538
AKT1	0.961538	0.595238	3.63636	1.92308
HRAS	0.961538		1.81818
ARAF	0.883978	1.89873		2.04082
NTRK3	0.878735
MAPK1	0.878735	1.0101
PTPN11	0.854701	1.19048		1.92308
MLH1	0.854701
IDH1	0.747863	1.19048
RIT1	0.662983	1.26582		2.04082
VHL	0.641026	0.595238		1.92308
NFE2L2	0.641026
HNF1A	0.641026	0.595238
CDKN2B	0.595238	3.38983		5
GATA3	0.552486
ROS1	0.441989	0.632911
MAP2K2	0.331492		2.5
MPL	0.320513	0.595238	1.81818
SRC	0.27248
GNA11	0.213675	0.595238	1.81818	1.92308
JAK3	0.213675	0.595238	1.81818	1.92308
DDR2	0.175747
GNAQ	0.106838

[truncated: 5 more sheets: S6C - Alterations only by cohor, S6D - VAF>0.5% by cohort, S7 - HER2+ cases, S8 - ERBB2 on 1L POD, S9 - Prognostic table]
